# Supplementary material
Source: PubMed Central journal article supplement (PMC7415715)
Supplement: NIHMS1601191-supplement-775_2020_1794_MOESM1_ESM.pdf [file NIHMS1601191-supplement-775_2020_1794_MOESM1_ESM.pdf]

*Supporting Information*

**An Integrated Biophysical Approach to Discovering Mechanisms of NDM-1 Inhibition for Several Thiol-Containing Drugs**

Sarah Fullington, Zishuo Cheng, Caitlyn Thomas, Callie Miller, Kundi Yang, Lin-Cheng Ju, Alexander Bergstrom, Ben Shurina, Stacey Lowery Bretz, Richard C. Page\*, David L. Tierney\* and Michael W. Crowder\*

Department of Chemistry and Biochemistry, Miami University, 651 E. High Street, Oxford, OH 45056

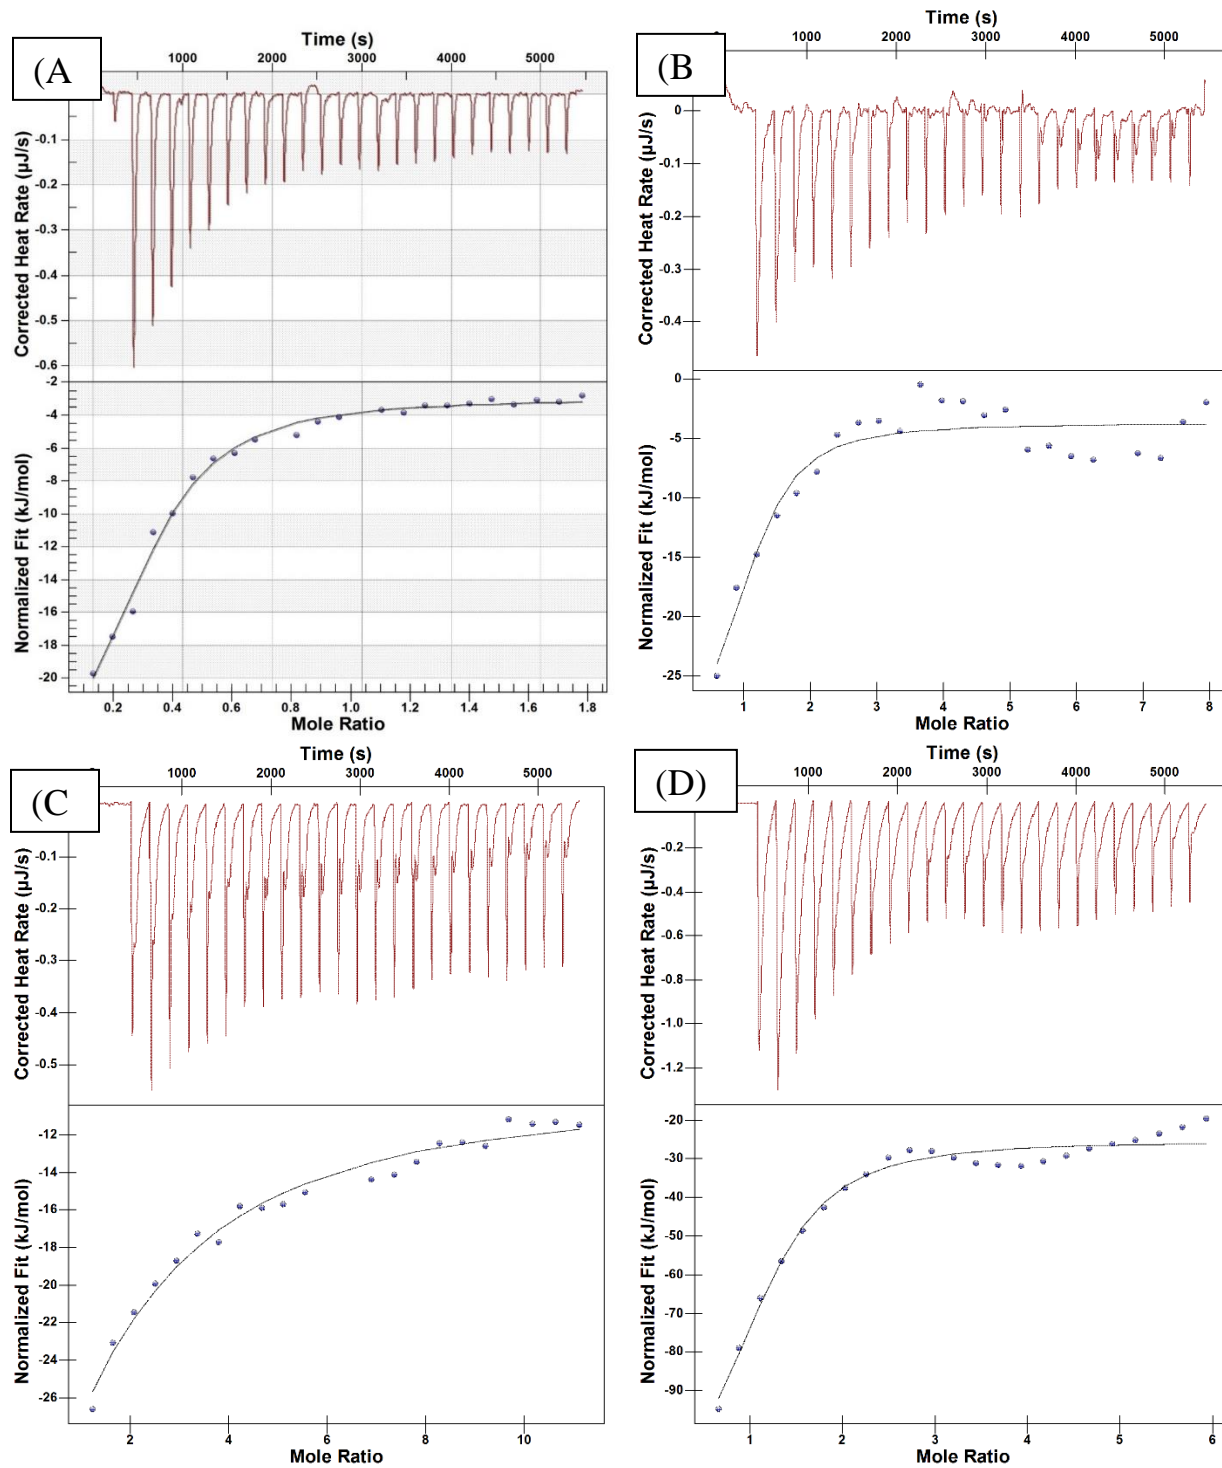

**Figure S1.** ITC titrations of ZnZn-NDM-1 with (A) thiorphan, (B) captopril, (C) tiopronin, and (D) 2,3-dimercaprol.

Upper panels show titration thermograms (red); lower panels show the integrated data with fitted curves (blue).

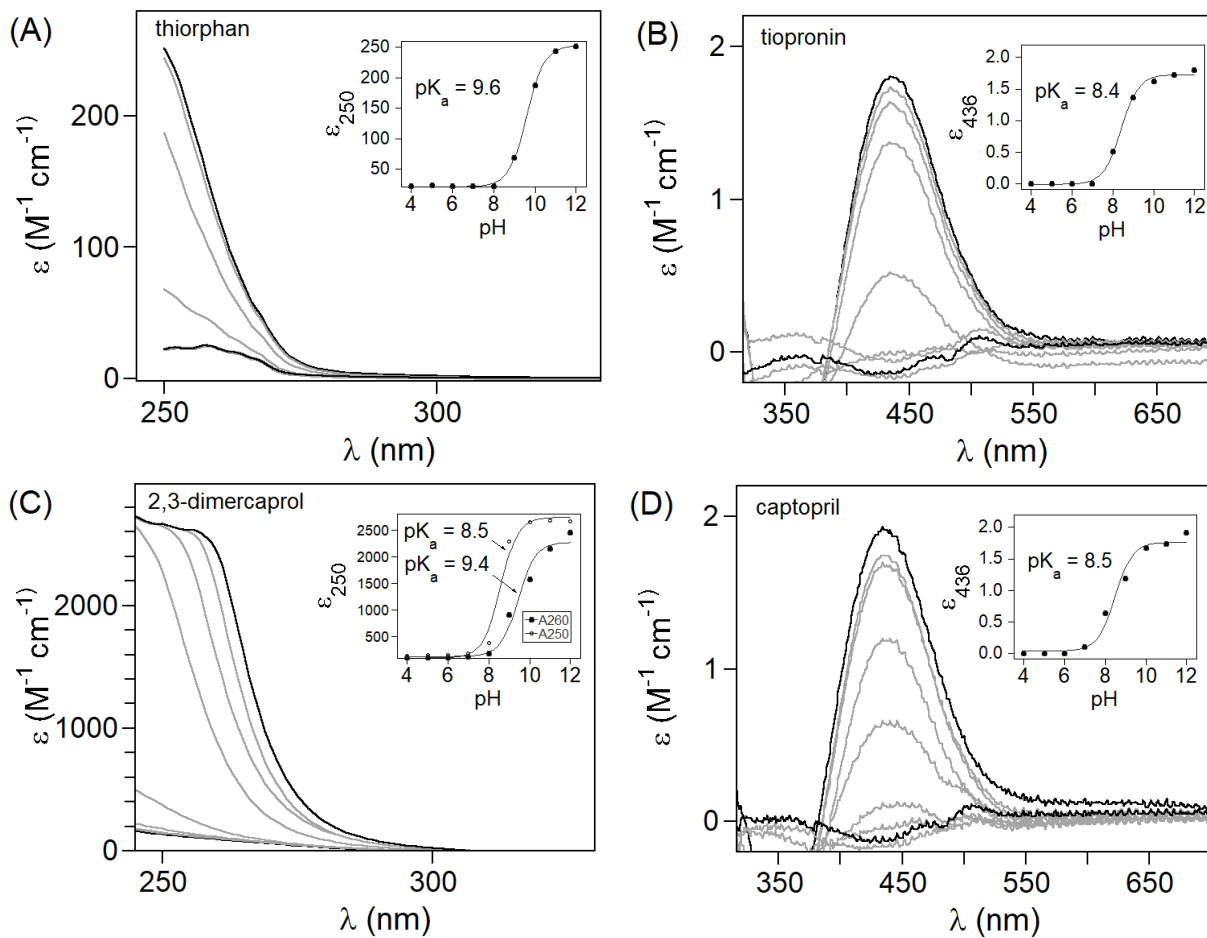

**Figure S2.** UV-visible spectra of (A) 10 mM thiorphan, (B) 10 mM tiopronin, (C) 1 mM dimercaprol, and (D) 10 mM captopril, as a function of pH. In each case, the low pH (low  $\epsilon$ ) and high pH (high  $\epsilon$ ) spectrum is shown in black, with the intervening pH values shown in gray. **Insets:** Fits to  $\epsilon$  at  $\lambda_{max}$  vs. pH, according to Eq. 1 (see text).

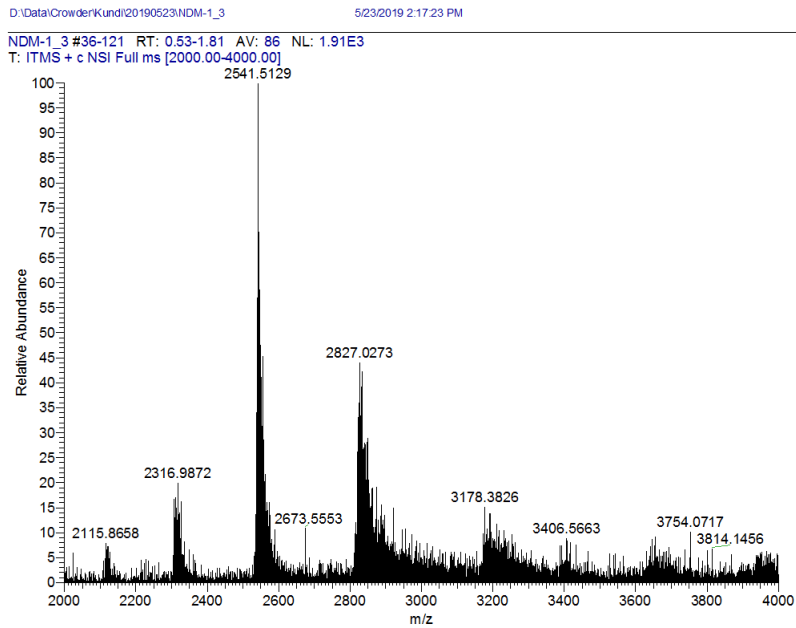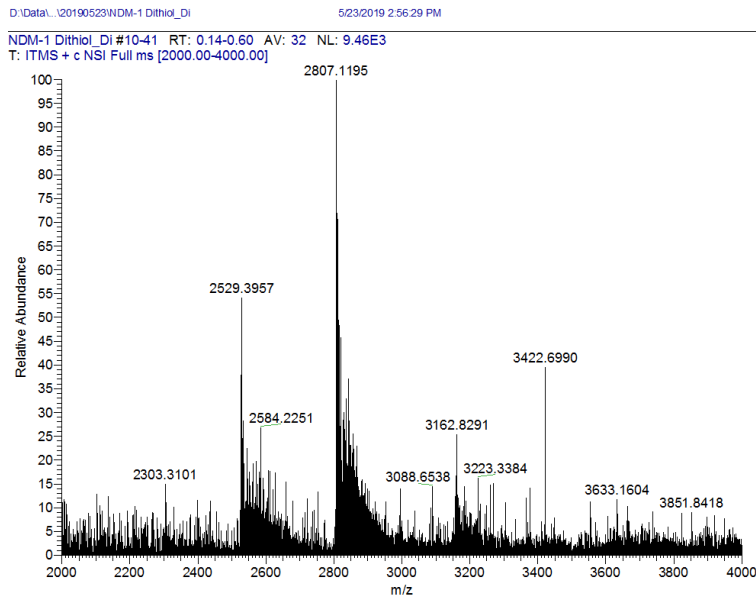

**Figure S3.** Native-ESI MS data for **(top)** ZnZn-NDM-1 and **(bottom)** ZnZn-NDM-1 treated with 2,3-dimercaprol. Both protein samples were in 100 mM ammonium acetate, pH 7.5. The +10 and +9 charged peaks were observed from both samples in positive mode.

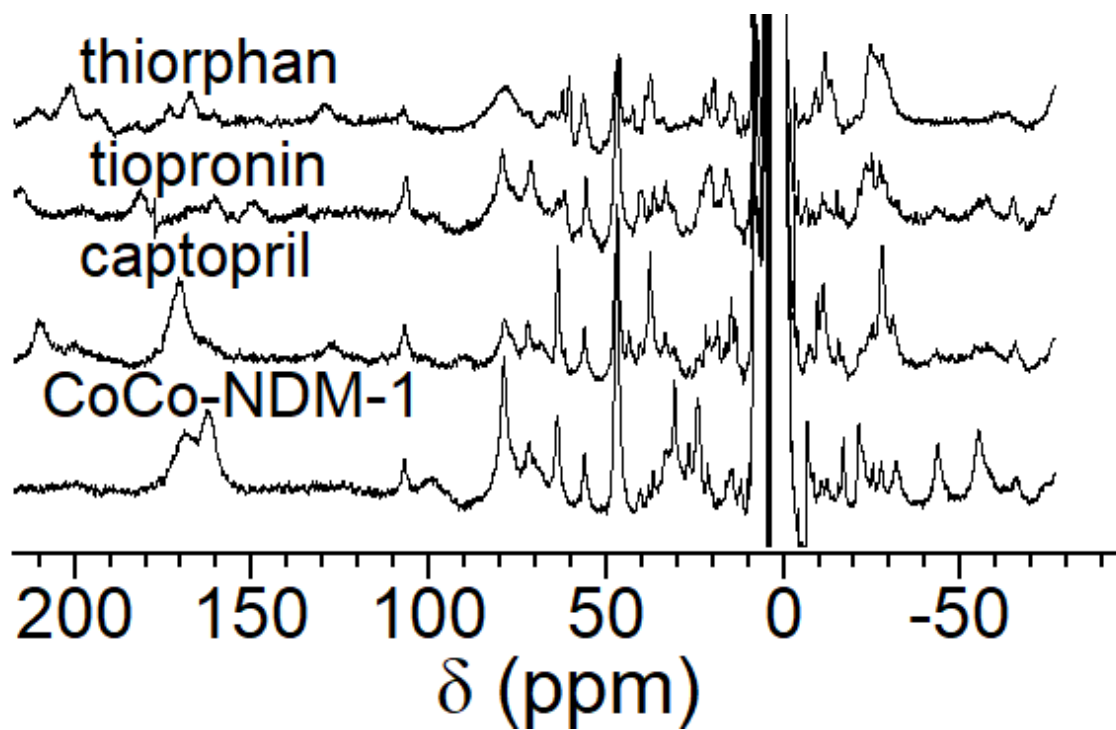

Figure S4. <sup>1</sup>H NMR spectra of CoCo-NDM-1 thiol inhibitor complexes, as collected.

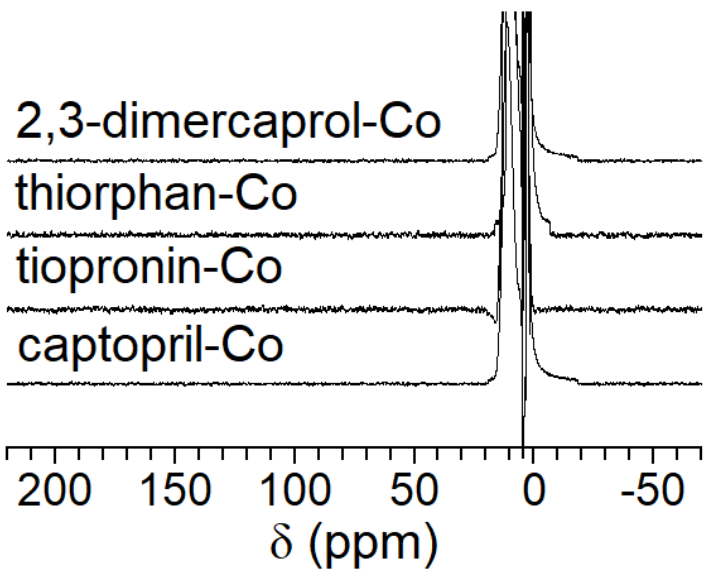

Figure S5. <sup>1</sup>H NMR spectra of Co(II) in the presence of excess inhibitor (without enzyme).

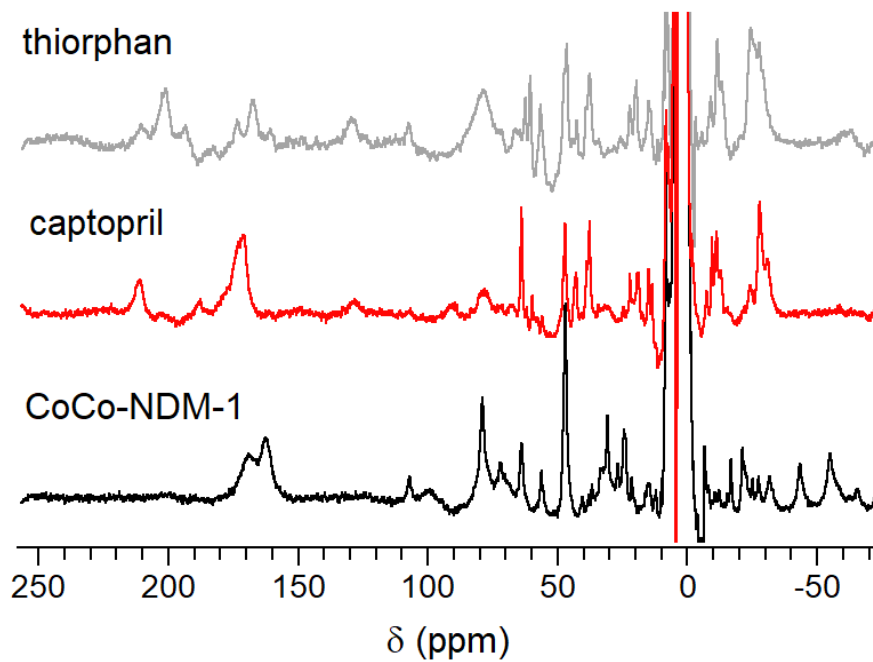

Figure S6. Comparison of the <sup>1</sup>H NMR spectra for CoCo-NDM-1, and its complexes with thiorphan and captopril.
